# Supplementary material for: Evaluation of Sputtering Processes in Strontium Iridate Thin Films
Source: MDPI journal article supplement (doi:10.3390/nano14030242), 2024-01-23
Supplement: s1 [file s1]

# Evaluation of sputtering processes in strontium iridate thin films

*Victor Fuentes 1, Lluís Balcells 1, Zorica Konstantinović 2, Benjamín Martínez 1 and Alberto Pomar 1,\**

1 Instituto de Ciencia de Materiales de Barcelona, ICMA-B-CSIC, Campus Universitario UAB, 08193 Bellaterra, Spain

2 Center for Solid State Physics and New Materials, Institute of Physics Belgrade, University of Belgrade, Pregrevica 118, 11080 Belgrade, Serbia

\* Correspondence: apomar@icmab.es

## Supplementary Information

### Target Fabrication

A target of nominal composition  $\text{Sr}_2\text{IrO}_4$  was prepared. We have started from  $\text{SrCO}_3(\text{s})$  as reactive source for strontium (to avoid the use of unstable  $\text{SrO}$ ).  $\text{SrCO}_3$  was calcined at  $650^\circ\text{C}$  in air atmosphere to reach dehydration and decomposition into  $\text{SrO}$ ,

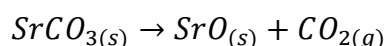

Then,  $\text{SrO}_{(\text{s})}$  is mixed stoichiometrically with  $\text{IrO}_2$  and heated to high temperatures between  $800^\circ\text{C}$ - $980^\circ\text{C}$  to achieve the solid chemical reaction,

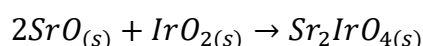

After reacting during every 12h, the powder was again mixed again and the whole thermal treatment was repeated several times to improve phase purity. At each step, the resultant powder was analyzed by X-Ray diffraction. Figure S1 depicts the  $\Theta$ - $2\Theta$  scans of the resultant powder after successive cycles of mixing and heating. In all the spectra the  $\text{Sr}_2\text{IrO}_4$  phase was the dominant one, being the peak (103) the most intense one (as predicted). In this figure, it can be observed that at the beginning of the process, other Ruddlesden-Popper phases may be identified as impurities. Nevertheless, after several cycles these phases are progressively transformed into the  $n=1$  phase. At the end of the process, the target is mainly  $\text{Sr}_2\text{IrO}_4$  with an impurity level lower than 5%. Finally, powder was compressed on a hydraulic press to produce a 1-1.3 inch target and it was hardened by a sintering process at  $980^\circ\text{C}$  during 48h.

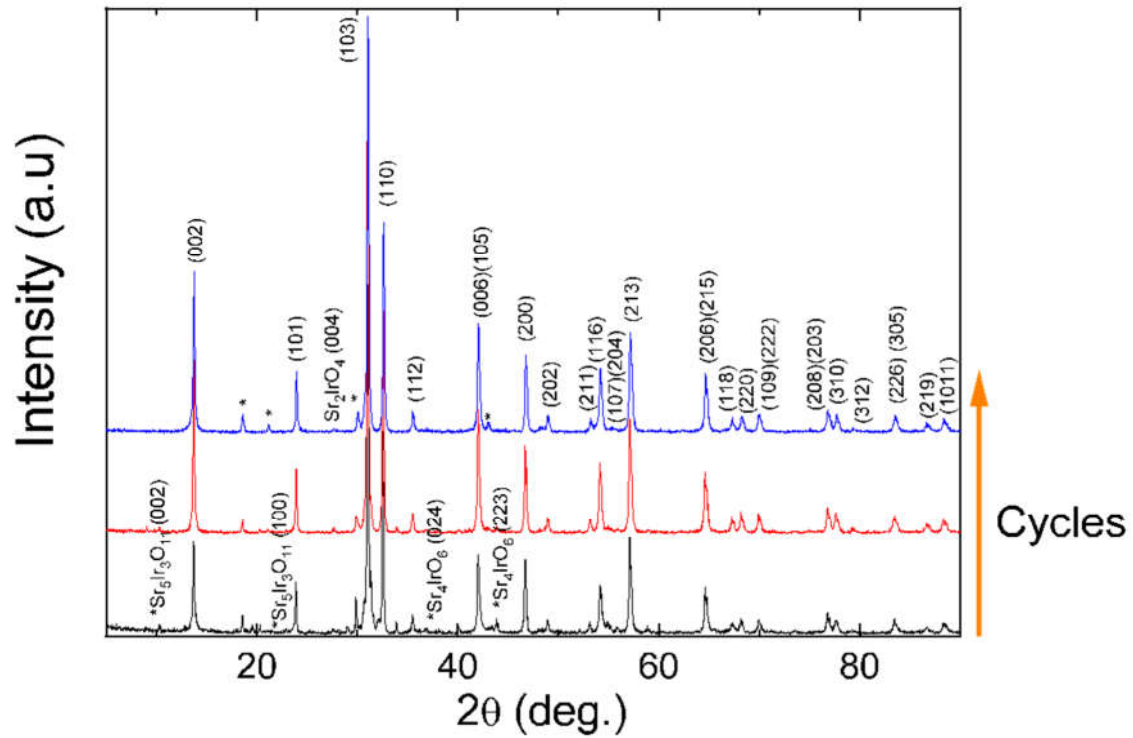

Figure S1:  $\theta$ - $2\theta$  scans of the target powder after several mixing and reaction cycles. Peaks are labelled with the corresponding  $\text{Sr}_2\text{IrO}_4$  reflections (pseudocubic notation).

### Influence of oxygen pressure during growth

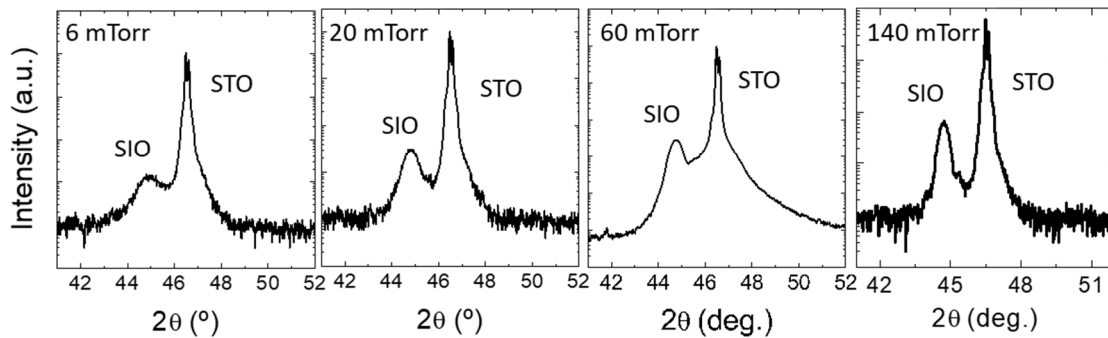

Figure S2:  $\theta$ - $2\theta$  scans of a series of SIO-113 thin films deposited at different oxygen pressures and fixed temperature of 900°C.

The change in background oxygen pressure during growth resulted in a better crystallinity of the SIO-113 films although only peaks associated with the perovskite-like  $n=\infty$  phase could be identified.
